# Supplementary material
Source: PubMed Central journal article supplement (PMC8628349)
Supplement: NIHMS1757305-supplement-1.pdf [file NIHMS1757305-supplement-1.pdf]

1  
2  
3  
4  
5  
6  
7  
8  
9  
10  
11  
12  
13  
14  
15  
16  
17  
18  
19  
20  
21  
22  
23  
24  
25  
26  
27  
28  
29  
30  
31  
32  
33  
34  
35  
36  
37  
38  
39  
40  
41  
42  
43  
44  
45  
46  
47  
48  
49  
50  
51  
52  
53  
54  
55  
56  
57  
58  
59  
60  
61  
62  
63  
64  
65**Appendix:****Supplementary Table 1.** SNOMED Concept code groupings for asthma, wheezing, eczema, allergic rhinitis, and food allergy

| Group                  | Concept                                                                                          |
|------------------------|--------------------------------------------------------------------------------------------------|
| <b>Asthma Concepts</b> | Acute asthma                                                                                     |
|                        | Acute exacerbation of allergic asthma                                                            |
|                        | Acute exacerbation of asthma                                                                     |
|                        | Acute exacerbation of asthma co-occurrent with allergic rhinitis                                 |
|                        | Acute exacerbation of chronic asthmatic bronchitis                                               |
|                        | Acute exacerbation of chronic obstructive airways disease with asthma                            |
|                        | Acute exacerbation of intrinsic asthma                                                           |
|                        | Acute exacerbation of mild persistent asthma                                                     |
|                        | Acute exacerbation of moderate persistent asthma                                                 |
|                        | Acute severe exacerbation of allergic asthma                                                     |
|                        | Acute severe exacerbation of asthma                                                              |
|                        | Acute severe exacerbation of asthma co-occurrent with allergic rhinitis                          |
|                        | Acute severe exacerbation of intrinsic asthma                                                    |
|                        | Acute severe exacerbation of mild persistent allergic asthma                                     |
|                        | Acute severe exacerbation of mild persistent allergic asthma co-occurrent with allergic rhinitis |
|                        | Acute severe exacerbation of mild persistent asthma                                              |
|                        | Acute severe exacerbation of moderate persistent allergic asthma                                 |
|                        | Acute severe exacerbation of moderate persistent asthma                                          |
|                        | Acute severe exacerbation of moderate persistent asthma co-occurrent with allergic rhinitis      |
|                        | Acute severe exacerbation of severe persistent allergic asthma                                   |
|                        | Acute severe exacerbation of severe persistent asthma                                            |
|                        | Acute severe exacerbation of severe persistent asthma co-occurrent with allergic rhinitis        |
|                        | Allergic asthma                                                                                  |
|                        | Allergic asthma due to <i>Dermatophagoides farinae</i>                                           |
|                        | Allergic asthma due to <i>Dermatophagoides pteronyssinus</i>                                     |
|                        | Allergic-infective asthma                                                                        |
|                        | Aspirin-induced asthma                                                                           |
|                        | Aspirin-sensitive asthma with nasal polyps                                                       |
|                        | Asthma                                                                                           |
|                        | Asthma-chronic obstructive pulmonary disease overlap syndrome                                    |
|                        | Asthma in mother complicating childbirth                                                         |
|                        | Asthmatic bronchitis                                                                             |
|                        | Asthma with irreversible airway obstruction                                                      |

1  
2  
3  
4 Asthma without status asthmaticus  
5 Bakers' asthma  
6 Brittle asthma  
7 Byssinosis  
8 Byssinosis grade 3  
9 Cheese-makers' asthma  
10 Chemical-induced asthma  
11 Childhood asthma  
12 Chronic asthmatic bronchitis  
13 Chronic asthma with fixed airflow obstruction  
14 Chronic obstructive asthma co-occurrent with acute exacerbation of  
15 asthma  
16 Colophony asthma  
17 Cough variant asthma  
18 Detergent asthma  
19 Drug-induced asthma  
20 Exacerbation of asthma  
21 Exacerbation of intermittent asthma  
22 Exacerbation of mild persistent asthma  
23 Exacerbation of moderate persistent asthma  
24 Exacerbation of severe persistent asthma  
25 Exercise-induced asthma  
26 Extrinsic asthma without status asthmaticus  
27 Flax-dressers' disease  
28 Hay fever with asthma  
29 IgE-mediated allergic asthma  
30 Intermittent asthma  
31 Intermittent asthma co-occurrent with allergic rhinitis  
32 Intermittent asthma uncontrolled  
33 Intrinsic asthma  
34 Intrinsic asthma without status asthmaticus  
35 Isocyanate induced asthma  
36 Late onset asthma  
37 Meat-wrappers' asthma  
38 Mild asthma  
39 Mild intermittent asthma  
40 Mild persistent allergic asthma  
41 Mild persistent asthma  
42 Mild persistent asthma co-occurrent with allergic rhinitis  
43 Millers' asthma  
44  
45  
46  
47  
48  
49  
50  
51  
52  
53  
54  
55  
56  
57  
58  
59  
60  
61  
62  
63  
64  
65

|    |                        |                                                                |
|----|------------------------|----------------------------------------------------------------|
| 1  |                        |                                                                |
| 2  |                        |                                                                |
| 3  |                        |                                                                |
| 4  |                        | Mixed asthma                                                   |
| 5  |                        | Moderate asthma                                                |
| 6  |                        | Moderate persistent allergic asthma                            |
| 7  |                        | Moderate persistent asthma                                     |
| 8  |                        | Moderate persistent asthma co-occurrent with allergic rhinitis |
| 9  |                        | Non-IgE mediated allergic asthma                               |
| 10 |                        | Occasional asthma                                              |
| 11 |                        | Occupational asthma                                            |
| 12 |                        | Platinum asthma                                                |
| 13 |                        | Printers' asthma                                               |
| 14 |                        | Seasonal asthma                                                |
| 15 |                        | Severe asthma                                                  |
| 16 |                        | Severe persistent allergic asthma                              |
| 17 |                        | Severe persistent asthma                                       |
| 18 |                        | Severe persistent asthma co-occurrent with allergic rhinitis   |
| 19 |                        | Steroid dependent asthma                                       |
| 20 |                        | Substance induced asthma                                       |
| 21 |                        | Sulfite-induced asthma                                         |
| 22 |                        | Tea-makers' asthma                                             |
| 23 |                        | Uncomplicated asthma                                           |
| 24 |                        | Uncomplicated mild persistent asthma                           |
| 25 |                        | Uncomplicated moderate persistent asthma                       |
| 26 |                        | Uncomplicated severe persistent asthma                         |
| 27 |                        | Weavers' cough                                                 |
| 28 |                        | Wood asthma                                                    |
| 29 |                        |                                                                |
| 30 |                        |                                                                |
| 31 |                        |                                                                |
| 32 |                        |                                                                |
| 33 |                        |                                                                |
| 34 |                        |                                                                |
| 35 |                        |                                                                |
| 36 |                        |                                                                |
| 37 |                        |                                                                |
| 38 |                        |                                                                |
| 39 |                        |                                                                |
| 40 | <b>Wheeze Concepts</b> |                                                                |
| 41 | Wheezing               | Respiratory symptom                                            |
| 42 |                        | Tracheobronchial disorder                                      |
| 43 |                        | Wheezing                                                       |
| 44 | Bronchiolitis          | Acute bronchiolitis                                            |
| 45 |                        | Acute bronchitis                                               |
| 46 |                        | Bronchitis                                                     |
| 47 | Influenza              | Influenza with respiratory manifestation other than pneumonia  |
| 48 | <b>Cough Concepts</b>  | Allergic cough                                                 |
| 49 |                        | Barking cough                                                  |
| 50 |                        | Brassy cough                                                   |
| 51 |                        | C/O - cough                                                    |
| 52 |                        | Chesty cough                                                   |
| 53 |                        | Chronic cough                                                  |
| 54 |                        | Cough                                                          |
| 55 |                        |                                                                |
| 56 |                        |                                                                |
| 57 |                        |                                                                |
| 58 |                        |                                                                |
| 59 |                        |                                                                |
| 60 |                        |                                                                |
| 61 |                        |                                                                |
| 62 |                        |                                                                |
| 63 |                        |                                                                |
| 64 |                        |                                                                |
| 65 |                        |                                                                |

1  
2  
3  
4 Cough after eating  
5 Cough at rest  
6 Cough on exercise  
7 Cough with fever  
8 Does cough  
9 Does cough up sputum  
10 Dry cough  
11 Early morning cough  
12 Effective cough  
13 Episodic dry cough  
14 Hacking cough  
15 Increasing frequency of  
16 Morning cough  
17 Nocturnal cough  
18 Nocturnal cough / wheez  
19 Non-productive cough  
20 Painful cough  
21 Paroxysmal cough  
22 Persistent cough  
23 Postviral cough  
24 Productive cough  
25 Productive cough -clear  
26 Productive cough -green  
27 Productive cough-yellow  
28 Reflux cough  
29 Respiratory tract conge  
30 Spasmodic cough  
31 Unexplained cough

32  
33  
34  
35  
36  
37  
38  
39  
40  
41  
42  
43  
44 **Allergic Rhinitis**  
45 **Concepts**

46 Acute exacerbation of asthma co-occurrent with allergic rhinitis  
47 Acute severe exacerbation of asthma co-occurrent with allergic rhinitis  
48 Acute severe exacerbation of mild persistent allergic asthma co-occurrent  
49 with allergic rhinitis  
50 Acute severe exacerbation of moderate persistent asthma co-occurrent  
51 with allergic rhinitis  
52 Acute severe exacerbation of severe persistent asthma co-occurrent with  
53 allergic rhinitis  
54 Allergic rhinitis  
55 Allergic rhinitis caused by feathers  
56 Allergic rhinitis caused by insects  
57 Allergic rhinitis caused by mold  
58  
59  
60  
61  
62  
63  
64  
65

1  
2  
3  
4  
5  
6  
7  
8  
9  
10  
11  
12  
13  
14  
15  
16  
17  
18  
19  
20  
21  
22  
23  
24  
25  
26  
27  
28  
29  
30  
31  
32  
33  
34  
35  
36  
37  
38  
39  
40  
41  
42  
43  
44  
45  
46  
47  
48  
49  
50  
51  
52  
53  
54  
55  
56  
57  
58  
59  
60  
61  
62  
63  
64  
65

- Allergic rhinitis due to animal dander
  - Allergic rhinitis due to animal hair and dander
  - Allergic rhinitis due to animals
  - Allergic rhinitis due to *Dermatophagoides farinae*
  - Allergic rhinitis due to *Dermatophagoides pteronyssinus*
  - Allergic rhinitis due to food
  - Allergic rhinitis due to grass pollen
  - Allergic rhinitis due to house dust mite
  - Allergic rhinitis due to pollen
  - Allergic rhinitis due to tree pollen
  - Allergic rhinitis due to weed pollen
  - Hay fever with asthma
  - Intermittent asthma co-occurrent with allergic rhinitis
  - Mild persistent asthma controlled co-occurrent with allergic rhinitis
  - Mild persistent asthma co-occurrent with allergic rhinitis
  - Mild persistent asthma uncontrolled co-occurrent with allergic rhinitis
  - Moderate persistent asthma co-occurrent with allergic rhinitis
  - Moderate persistent asthma uncontrolled co-occurrent with allergic rhinitis
  - Moderate persistent controlled asthma co-occurrent with allergic rhinitis
  - Perennial allergic rhinitis
  - Perennial allergic rhinitis with seasonal variation
  - Seasonal allergic rhinitis
  - Severe persistent asthma controlled co-occurrent with allergic rhinitis
  - Severe persistent asthma co-occurrent with allergic rhinitis
  - Severe persistent asthma uncontrolled co-occurrent with allergic rhinitis
- Eczema Concepts**
- Acantholytic vesicular dermatitis
  - Acute cheiropodopompholyx
  - Acute constitutional eczema
  - Acute constitutional hand eczema
  - Acute eczema
  - Acute eczematoïd otitis externa
  - Acute hand eczema
  - Acute infantile eczema
  - Acute-on-chronic vesicular eczema of feet
  - Acute-on-chronic vesicular eczema of hands
  - Acute-on-chronic vesicular eczema of hands and feet
  - Acute-on-chronic vesicular eczema of hands and/or feet
  - Acute podopompholyx
  - Acute vesicular dermatitis

1  
2  
3  
4  
5 Acute vesicular eczema of hand  
6 Acute vesicular eczema of hands and/or feet  
7 Adult atopic dermatitis  
8 Adult atopic dermatitis commencing in adult life  
9 Adult atopic dermatitis persistent from childhood  
10 Adult atopic dermatitis recurrent in adult life  
11 Allergic inhalant dermatitis  
12 Annular seborrheide  
13 Apron pattern of vesicular eczema of hands  
14 Asteatotic eczema  
15 Atopic dermatitis  
16 Atopic dermatitis aggravated by type 1 immune reaction  
17 Atopic dermatitis due to animal dander  
18 Atopic dermatitis of eyelid  
19 Atopic dermatitis of face  
20 Atopic dermatitis of hands  
21 Atopic dermatitis of scalp  
22 Atopic neurodermatitis  
23 Atopy as co-factor in hand eczema  
24 Ballooning vesicular dermatitis  
25 Besnier's prurigo  
26 Brachioradial pruritus  
27 Brocq's neurodermatitis  
28 Childhood atopic dermatitis  
29 Chronic constitutional eczema  
30 Chronic constitutional hand eczema  
31 Chronic eczema  
32 Chronic eczema of external auditory canal  
33 Chronic hand eczema  
34 Chronic infantile eczema  
35 Chronic lichenified atopic dermatitis  
36 Chronic podopompholyx  
37 Chronic relapsing vesiculosquamous hand eczema  
38 Chronic superficial scaly dermatitis  
39 Chronic vesicular eczema of hands  
40 Chronic vesicular eczema of hands and feet  
41 Chronic vesicular eczema of hands and/or feet  
42 Constitutional discoid hand eczema  
43 Constitutional eczema  
44 Constitutional eczema of feet  
45  
46  
47  
48  
49  
50  
51  
52  
53  
54  
55  
56  
57  
58  
59  
60  
61  
62  
63  
64  
65

1  
2  
3  
4 Constitutional eczema of hands  
5  
6 Constitutional eczema of hands and feet  
7  
8 Constitutional/endogenous eczema of hands and/or feet  
9  
10 Constitutional factors as co-factor in hand eczema  
11 Constitutional fingertip eczema  
12 Constitutional predisposition as co-factor in eczema  
13 Contact hand eczema  
14 Contact with irritant as co-factor in eczema  
15 Contact with irritant as co-factor in hand eczema  
16  
17 Crusted eczema  
18  
19 Cumulative irritant contact dermatitis of hands  
20 Cumulative irritant contact dermatitis of hands due to wet work  
21 Dermatitis and eczema  
22  
23 Dermatitis due to sweating and friction  
24 Desiccation eczema  
25  
26 Diffuse neurodermatitis of Brocq  
27 Discoid atopic dermatitis  
28 Discoid eczema of hand  
29  
30 Discoid eczema of hands and feet  
31 Discoid pattern atopic hand dermatitis  
32 Disseminated secondary eczema  
33 Distinctive exudative discoid AND lichenoid chronic dermatosis of  
34 Sulzberger and Garbe  
35  
36 Dry discoid eczema  
37  
38 Dry eczema  
39  
40 Eczema  
41 Eczema craquele due to acute edema  
42 Eczema herpeticum  
43 Eczema of ear lobe  
44 Eczema of external auditory canal  
45  
46 Eczema of face  
47  
48 Eczema of finger  
49 Eczema of leg  
50 Eczema of nipple  
51 Eczema of wrist  
52  
53 Eczematid-like purpura of Doucas and Kapetanakis  
54 Eczematized psoriasis  
55  
56 Eczematous cheilitis  
57 Eczematous dermatitis of eyelid  
58  
59 Eczematous dermatitis of lower eyelid  
60  
61  
62  
63  
64  
65

|    |                                                          |
|----|----------------------------------------------------------|
| 1  |                                                          |
| 2  |                                                          |
| 3  |                                                          |
| 4  | Eczematous dermatitis of upper eyelid                    |
| 5  | Eczematous drug eruption                                 |
| 6  | Eczema vaccinatum                                        |
| 7  | Erythemasquamous dermatosis                              |
| 8  | Erythrodermic atopic dermatitis                          |
| 9  | Erythrodermic eczema                                     |
| 10 | Exacerbation of eczema                                   |
| 11 | Excoriated eczema                                        |
| 12 | Exogenous eczema of hands and/or feet                    |
| 13 | Exogenous foot eczema                                    |
| 14 | Exogenous hand eczema                                    |
| 15 | Exposure to skin irritant as co-factor in eczema         |
| 16 | Exudative discoid eczema                                 |
| 17 | Exudative eczema                                         |
| 18 | Facial eczema                                            |
| 19 | Fingertip eczema                                         |
| 20 | Flexural atopic dermatitis                               |
| 21 | Flexural eczema                                          |
| 22 | Follicular atopic dermatitis                             |
| 23 | Foot eczema                                              |
| 24 | Frictional lichenoid eruption                            |
| 25 | Friction eczema                                          |
| 26 | Friction palmar eczema                                   |
| 27 | Generalized atopic dermatitis                            |
| 28 | Generalized eczema                                       |
| 29 | Generalized eczema due to systemically administered drug |
| 30 | Genitocrural intertrigo                                  |
| 31 | Hand and/or foot eczema                                  |
| 32 | Hand eczema                                              |
| 33 | Hyperkeratotic eczema of hands and feet                  |
| 34 | Hyperkeratotic eczema of hands and/or feet               |
| 35 | Hyperkeratotic eczema of palms                           |
| 36 | Hyperkeratotic eczema of soles                           |
| 37 | Hyperkeratotic fissured hand eczema                      |
| 38 | Impetiginized atopic dermatitis                          |
| 39 | Infantile atopic dermatitis                              |
| 40 | Infantile eczema                                         |
| 41 | Infected discoid eczema                                  |
| 42 | Infected eczema                                          |
| 43 | Infectious eczematoid dermatitis                         |
| 44 |                                                          |
| 45 |                                                          |
| 46 |                                                          |
| 47 |                                                          |
| 48 |                                                          |
| 49 |                                                          |
| 50 |                                                          |
| 51 |                                                          |
| 52 |                                                          |
| 53 |                                                          |
| 54 |                                                          |
| 55 |                                                          |
| 56 |                                                          |
| 57 |                                                          |
| 58 |                                                          |
| 59 |                                                          |
| 60 |                                                          |
| 61 |                                                          |
| 62 |                                                          |
| 63 |                                                          |
| 64 |                                                          |
| 65 |                                                          |



1  
2  
3  
4  
5  
6  
7  
8  
9  
10  
11  
12  
13  
14  
15  
16  
17  
18  
19  
20  
21  
22  
23  
24  
25  
26  
27  
28  
29  
30  
31  
32  
33  
34  
35  
36  
37  
38  
39  
40  
41  
42  
43  
44  
45  
46  
47  
48  
49  
50  
51  
52  
53  
54  
55  
56  
57  
58  
59  
60  
61  
62  
63  
64  
65

- Infective dermatitis co-occurrent and due to human T-cell lymphotropic virus 1 infection
- Infective eczematoid dermatitis
- Inverse pattern atopic dermatitis
- Irritant contact hand eczema
- Juvenile plantar dermatosis
- Kaposi's varicelliform eruption due to vaccinia virus
- Lichenification and lichen simplex chronicus
- Lichenified eczema
- Lichen nuchae
- Lichen simplex chronicus
- Lichen simplex of perianal skin
- Lichen simplex of scrotum
- Lichen simplex of vulva
- Lip-licking eczema
- Localized eczema due to systemically administered drug
- Neurodermatitis
- Neurodermatitis of external ear
- Nonallergic eczema
- Nummular eczema
- Occupational allergic contact dermatitis
- Occupational eczema
- O/E - pompholyx
- Papular eczema with elimination of papillary edema
- Papuloerythroderma of Ofuji
- Parakeratosis
- Photoaggravated atopic dermatitis
- Photosensitive atopic dermatitis
- Pityriasiform seborrheide
- Podopompholyx
- Polymorphous light eruption, eczematous type
- Post-traumatic eczema
- Pruriginous atopic dermatitis
- Prurigo pattern atopic dermatitis
- Psoriasiform eczema
- Psoriasiform napkin eruption
- Psoriasis-eczema overlap condition
- Pustular eczema
- Scaling eczema
- Seborrheic eczema-like eruption

1  
2  
3  
4  
5  
6  
7  
8  
9  
10  
11  
12  
13  
14  
15  
16  
17  
18  
19  
20  
21  
22  
23  
24  
25  
26  
27  
28  
29  
30  
31  
32  
33  
34  
35  
36  
37  
38  
39  
40  
41  
42  
43  
44  
45  
46  
47  
48  
49  
50  
51  
52  
53  
54  
55  
56  
57  
58  
59  
60  
61  
62  
63  
64  
65

Seborrhoeide  
Secondary eczematous condition  
Senile asteatotic eczema  
Senile xeroderma  
Site-specific eczema  
Unclassifiable eczema  
Varicose eczema  
Varicose veins of leg in long saphenous vein distribution with eczema  
Varicose veins of leg in short saphenous vein distribution with eczema  
Varicose veins of the leg with eczema  
Varicose veins of the leg with ulcer and eczema  
Vesicular eczema  
Vesicular eczema of hands and/or feet  
Vesicular hand eczema  
Vesiculosquamous hand eczema  
Vulval eczema

**Food Allergy  
Concepts**

Allergy to almond  
Allergy to almond oil  
Allergy to apple juice  
Allergy to banana  
Allergy to barley  
Allergy to bean  
Allergy to beef  
Allergy to carrot  
Allergy to casein  
Allergy to cashew nut  
Allergy to celery  
Allergy to cherry  
Allergy to chicken meat  
Allergy to cinnamon  
Allergy to citrus fruit  
Allergy to clam  
Allergy to coconut oil  
Allergy to corn  
Allergy to dairy product  
Allergy to dietary mushroom  
Allergy to dietary mustard  
Allergy to eggs  
Allergy to fish

- 1
- 2
- 3
- 4 Allergy to fruit
- 5 Allergy to hazelnut
- 6 Allergy to legumes
- 7 Allergy to lobster
- 8 Allergy to lupine
- 9 Allergy to macadamia nut
- 10 Allergy to marine crustacean
- 11 Allergy to meat
- 12 Allergy to mollusk
- 13 Allergy to nut
- 14 Allergy to oats
- 15 Allergy to oyster
- 16 Allergy to peanuts
- 17 Allergy to pineapple
- 18 Allergy to pork
- 19 Allergy to potato
- 20 Allergy to red meat
- 21 Allergy to rye
- 22 Allergy to seafood
- 23 Allergy to seed
- 24 Allergy to shrimp
- 25 Allergy to soya
- 26 Allergy to strawberries
- 27 Allergy to tomato
- 28 Allergy to walnut
- 29 Allergy to watermelon
- 30 Allergy to wheat
- 31 Arachis oil allergy
- 32 Cheese allergy
- 33 Chocolate allergy
- 34 Cow's milk protein sensitivity
- 35 Egg protein allergy
- 36 Fish oils allergy
- 37 Food allergy
- 38 Gastrointestinal disorder due to food allergy
- 39 Gastrointestinal food allergy
- 40 Gelatin allergy
- 41 Glycine allergy
- 42 Guar gum allergy
- 43 Olive oil allergy
- 44
- 45
- 46
- 47
- 48
- 49
- 50
- 51
- 52
- 53
- 54
- 55
- 56
- 57
- 58
- 59
- 60
- 61
- 62
- 63
- 64
- 65

- 1
- 2
- 3
- 4
- 5
- 6
- 7
- 8
- 9
- 10
- 11
- 12
- 13
- 14
- 15
- 16
- 17
- 18
- 19
- 20
- 21
- 22
- 23
- 24
- 25
- 26
- 27
- 28
- 29
- 30
- 31
- 32
- 33
- 34
- 35
- 36
- 37
- 38
- 39
- 40
- 41
- 42
- 43
- 44
- 45
- 46
- 47
- 48
- 49
- 50
- 51
- 52
- 53
- 54
- 55
- 56
- 57
- 58
- 59
- 60
- 61
- 62
- 63
- 64
- 65

Omega 3-marine triglycerides allergy  
Pollen-food allergy  
Salmon calcitonin allergy  
Shellfish allergy  
Soy protein sensitivity  
Tryptophan allergy

**Supplementary Table 2: Age-level effect on asthma diagnosis (reference: Age 6-9 months):**

| <b>Age (months)</b> | <b>Odds Ratio</b> | <b>95% CI</b> | <b>P-value</b> |
|---------------------|-------------------|---------------|----------------|
| 9                   | 0.96              | 0.90-1.02     | 0.178          |
| 12                  | 1.08              | 1.02-1.15     | 0.010          |
| 15                  | 1.03              | 0.97-1.10     | 0.306          |
| 18                  | 0.91              | 0.85-0.97     | 0.002          |
| 21                  | 0.75              | 0.71-0.80     | < 0.001        |
| 24                  | 0.82              | 0.77-0.88     | < 0.001        |
| 27                  | 0.66              | 0.62-0.70     | < 0.001        |
| 30                  | 0.59              | 0.55-0.63     | < 0.001        |
| 33                  | 0.52              | 0.48-0.56     | < 0.001        |
| 36                  | 0.67              | 0.62-0.71     | < 0.001        |
| 39                  | 0.53              | 0.49-0.57     | < 0.001        |
| 42                  | 0.46              | 0.43-0.50     | < 0.001        |
| 45                  | 0.43              | 0.39-0.46     | < 0.001        |
| 48                  | 0.54              | 0.50-0.58     | < 0.001        |
| 51                  | 0.43              | 0.39-0.46     | < 0.001        |
| 54                  | 0.34              | 0.31-0.37     | < 0.001        |
| 57                  | 0.31              | 0.28-0.34     | < 0.001        |
| 60                  | 0.38              | 0.35-0.42     | < 0.001        |
| 63                  | 0.30              | 0.27-0.33     | < 0.001        |
| 66                  | 0.24              | 0.22-0.27     | < 0.001        |
| 69                  | 0.22              | 0.20-0.24     | < 0.001        |
| 72                  | 0.27              | 0.25-0.30     | < 0.001        |
| 75                  | 0.19              | 0.17-0.22     | < 0.001        |
| 78                  | 0.18              | 0.16-0.20     | < 0.001        |
| 81                  | 0.15              | 0.14-0.17     | < 0.001        |
| 84                  | 0.20              | 0.18-0.22     | < 0.001        |
| 87                  | 0.18              | 0.16-0.21     | < 0.001        |
| 90                  | 0.21              | 0.18-0.23     | < 0.001        |
| 93                  | 0.27              | 0.23-0.31     | < 0.001        |
